# Supplementary material for: Fabrication of copper-based ZnO nanopencil arrays with high-efficiency dropwise condensation heat transfer performance
Source: Royal Society of Chemistry journal article supplement (doi:10.1039/c6ra09699a), 2016-01-01
Supplement: c6ra09699a1.pdf [file c6ra09699a1.pdf]

## Supporting information

### **Fabrication of Copper-Based ZnO Nanopencil Arrays with High-Efficiency Dropwise Condensation Heat Transfer Performance**

Jia Liu, Mengnan Qu\* and Jinmei He

College of Chemistry and Chemical Engineering, Xi'an University of Science and Technology, Xi'an 710054, P. R. China.

\*Email: [mnanqu@gmail.com](mailto:mnanqu@gmail.com)

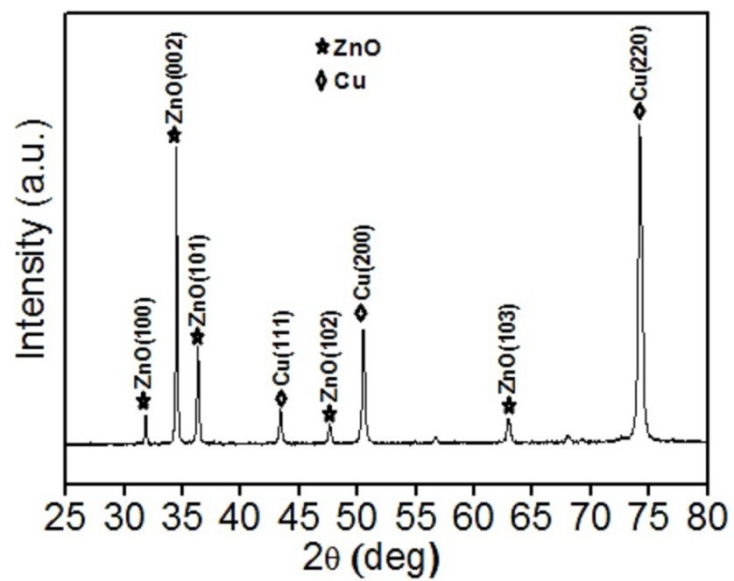

**Fig. S1** X-ray diffraction pattern of in situ grown ZnO nanopencil films on the copper surface.

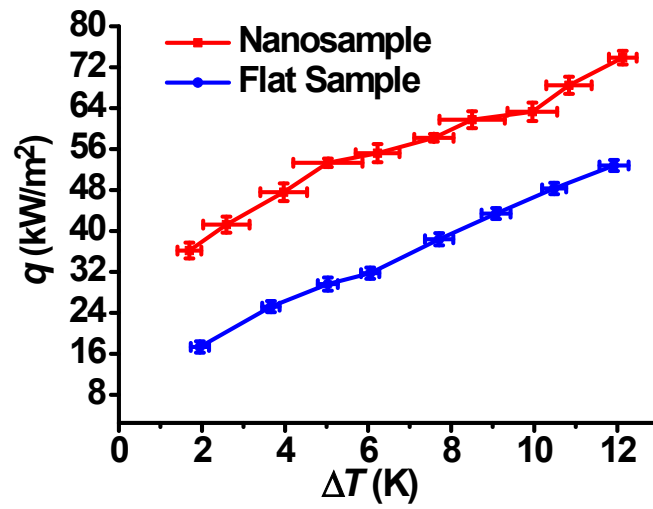

**Fig. S2** Measured heat flux ( $q$ ) of the superhydrophobic nanostructured surface (red) and the contrast hydrophobic flat surface (blue) varied with the degree of wall subcooling ( $\Delta T$ ) under the fixed saturated vapor pressure of 6.45 kPa.
